# Supplementary material
Source: PubMed Central journal article supplement (PMC3670387)
Supplement: 1302616110_pnas.201302616SI.pdf [file 1302616110_pnas.201302616SI.pdf]

# Supporting Information

Bartlett et al. 10.1073/pnas.1302616110

## A Mpa Ligase alignment

Mpa Lig KMEQ---PEWEEPMLATLT-SKRFDHGWAFGHKLDGARCLAYRK  
Mtu Lig KDQKVFEDNLAPMLATHGTVAGLKASQWAFEGKWDGYRLLVEAD  
Msm Lig KNAR---FEDFAPMLATEGSAKYKAKQWAFEGKWDGYRIIDAD  
Pae Lig KTPM---PEWIEELASL--VEQPPHGQWAYELKLDGYRLMSRIE

Mpa Lig DGHVRLMSRTRHEMNASYF EVADALMAQKANDFIIDG EIVALDEN  
Mtu Lig HGAVRLRSRSGRDVTAEYPLRLA LAEDLADHHVVLDGEAVVLDSS  
Msm Lig HQQLQIRSRTRGREVTGEYPLFKALAADLAEHHVVLDGEAVVLDSS  
Pae Lig DGHVRLMLTNGHDWSERLHLKKA LAGLGLERSWLDGELVVLDDE

Mpa Lig GNSKFEELQPRMGLLEDPAEARRTGIPVHYVFDILFYDGYEITRL  
Mtu Lig GVPFSFSQMNRRG-----RDTRVFEWAFD LLYLDGRA LLGT  
Msm Lig GVPFSFGQMNRRA-----RSTRVFEWAFD ILWLDGRS LLRA  
Pae Lig GRDFQALQNAFE-----EGHGENILYFLFDLPYHEGEDLRDV

Mpa Lig PLEERKHILEKTLDTYGD--DTRVFLIEDRLGGGLGLFDEACKKGEWEG  
Mtu Lig RYQDRRKLLETLANAT---SLTVPELLPGDGAQAFACSRKHGWEG  
Msm Lig KYSDRRKILEALADGG---GLIVPDQLPGDGP EAM EHVRRKR FEG  
Pae Lig ALEERRARLEALLDGQDEDP LRF SATLAENPRD LLA SACLGLLEG

Mpa Lig LIAKRAYGPIYVH-GRSDEWLKFKCVQNEFVIGGYTEPHGKR I-E  
Mtu Lig VIAKRRDRYQPGRRCA SWVKDKHWNTQEVVIGGWRAGEGGRSSG  
Msm Lig VVAKKWDSTYQPGRRSSSWIKDKIWNTEV VIGGWRQEGEGGRSSG  
Pae Lig VIGKRLG SVYRS-RRSNDWIKLKCQLRQEFVIVGYTEPKGSR-H

Mpa Lig FGAIVLGYQD--GKLMYAGKVTGDEEKT LRS LMDKFRPIERK  
Mtu Lig VGSLLMGIPGF--GG LQFAGRVTGSLSERELANLKEMLAPLHTD  
Msm Lig IGAIVLGLIPGF--EGLQFVGRVTGTEKE LSKLKDMLKPLHTD  
Pae Lig IGALLGLLYSPDEERRIRYAGKVTGTEAASLKKVHERLAPLAIN

Mpa Lig ASPFAEE--VREKEVHWLEPKLVAEIGFEWTDYGKLRQPRYDG  
Mtu Lig ESPFDVPLPARDKGIYV KPA LVAEVRYSEWTFEGR LRQSSWRG  
Msm Lig ESPENAPLPKVDARGVT FVRPELVG EVRYSER TSDGR LRQPSWRG  
Pae Lig SPLAKVPPARETG VQWVRPERLCEVSYAQMTRG GIIRQAVFHG

Mpa Lig LRYDKDPHSVIREVP  
Mtu Lig LRPDKKPSSEVVR---  
Msm Lig LRPDKTEDEVVW---  
Pae Lig LREDKPAR E V TGERP

## B Mpa Pol alignment

Mpa Pol HDIKVTNPDKVLFPEDGITKGE LVDYYRRISGVMVPLVGRGP  
Mtu Lig QRVTLTNADKVLYPATGTTKSDIFDYYAGVAEVM LGH IAGRP  
Msm Lig ERVRLTNPDKVLYPATGTTKAEVFDYYLSIAQVMVPH IAGRP  
Pae Lig AGVRI SHPRRLIDP S IQA SKLELA EFHARYAD LLLRLDRERP

Mpa Pol MTMQRFEDGIGKEGFFQKEASDY-FFDWHR-ATLELGKGGI  
Mtu Lig ATRKRWFNGVDQPAFFEKQLALS-APPWLSR-ATVAHRS GTT  
Msm Lig VTRKRWFNGVAEEAFFEKQLASS-APSWLER-GSITHKSGTT  
Pae Lig VSLV RGFEDGIGGELFRQKHAAARLKI PGIVQLDPA LDPGHPP-

Mpa Pol QHQVVCDDAATVYVLA SQAMITPHVFLSRIDK-----V--H  
Mtu Lig TYP-IIDSATGLAWIAQQAAL EHVHPQWR FVAEPGSGELNPG  
Msm Lig TYP-IINTREGLAWVAQQA SLEVHVHPQWR FED-----GDQG  
Pae Lig --LLQIRSAEALV GAVQMGSI EFTWNASLAN-----L--E

Mpa Pol YPDRLIFDLDLFP-DNNFET-VRSAAKTIFEA LDAEGYPVYLM T  
Mtu Lig PATRLVFDLDLPG-EGVMMAQLAEVARAVRD LLDIGLVTFPVT  
Msm Lig PATRIVFDLDLPG-EGVTMTQLCEIAHEVRALMTDLDLETYP LT  
Pae Lig RPDRLFVLDLDRDPA LPWKR-MLEATQLS LTLLEDELGLRA FLKT

Mpa Pol TGSRLHVVVPLDRSADFDTVRAFARGFGKLTKKYPDRFTI  
Mtu Lig SGSKGLHLTYPLDEPVSSRGATV LAKRVAQRLEQAMPALVTS  
Msm Lig SGSKGLHLTYVPLAEP ISSRGA SVLARRVAQQLEQAMPKLVTA  
Pae Lig SGGKGMHLLVPLERRHGWDEVKAFQAISQHLARLMPERFSA

Mpa Pol ELSKEKRRGRLEFDYLRNSYGQTVGAPYGVRRASGAPVATPIT  
Mtu Lig TMTKSLRAGKVFVDW SQNSGSKT IAPYSLRGRTHPTVAAPRT  
Msm Lig AMTKSLRAGKVFVDW SQNNAAKTTIAPYSLRGRDHTVAAAPRT  
Pae Lig VSGPRNRVGR I EVDYLRNSRGA STVAAVSVRRAREGLPVS VV

Mpa Pol WDELDDISGSQ EYNIRNIMGRMDKRG--DAWKYID  
Mtu Lig WAELDDPALR-QLSYDEV LTRIARDG--DLLERLD  
Msm Lig WDEIADPELR-HLRFDEVLDR LDEYQ--DLLAPLD  
Pae Lig REELDSLQGANQWNLRSLPQR LDEELAGD DPWADYA

Fig. S1. (Continued)

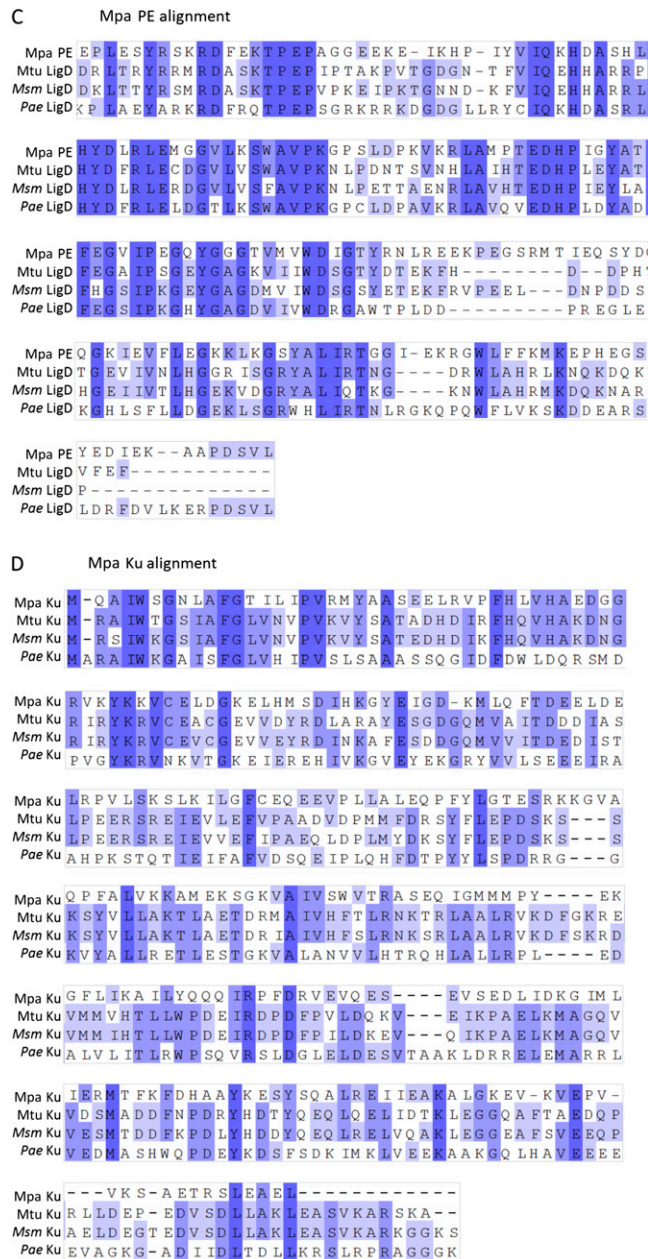

**Fig. S1.** Protein sequence alignments of *Methanocella paludicola* (Mpa) ligase (Lig), polymerase (Pol), phosphoesterase (PE), and Ku with *Mycobacterium tuberculosis* (Mtu), *Mycobacterium smegmatis* (Msm), *Pseudomonas aeruginosa* (Pae) ligase D (LigD), and Ku. (A) Mpa Lig protein sequence alignment with LigD ligase domains (LigDom) of Mtu, Msm, and Pae. (B) Mpa Pol protein sequence alignment with LigD Pol domains (PolDom) of Mtu, Msm, and Pae. (C) Mpa PE protein sequence alignment with LigD PE domains (PEDom) of Mtu, Msm, and Pae. (D) Mpa Ku protein sequence alignment with Ku of Mtu, Msm, and Pae. All alignments were made with Toffee and edited in JalView.

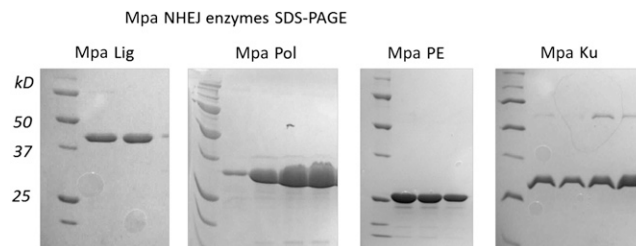

**Fig. S2.** SDS/PAGE Mpa Lig, Pol, PE, and Ku. SDS/PAGE of gel filtration chromatography fractions of respective purifications of Mpa Lig, Pol, PE and Ku. Migration sizes of the proteins were Mpa Lig ~40; Mpa Pol ~34 kD; Mpa PE ~24 kD; and Mpa Ku ~30 kD (monomer) and ~60 kD (dimer). The gels demonstrate the high purity of the proteins.

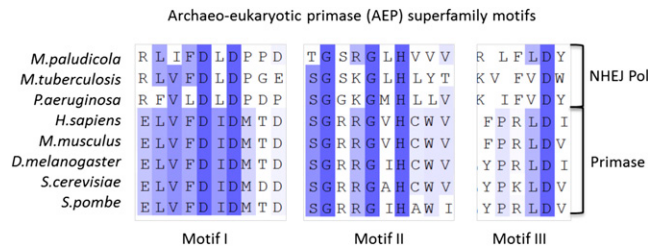

**Fig. 53.** Archaeo-eukaryotic primase (AEP) superfamily motif sequence alignment. Three key conserved motifs (I, II, and III) confer membership to the AEP superfamily. Here Mpa Pol is aligned with Mtu and Pae nonhomologous end-joining (NHEJ) Pols, and *Homo sapiens*, *Mus musculus*, *Drosophila melanogaster*, *Saccharomyces cerevisiae*, and *Schizosaccharomyces pombe* primase small subunits.

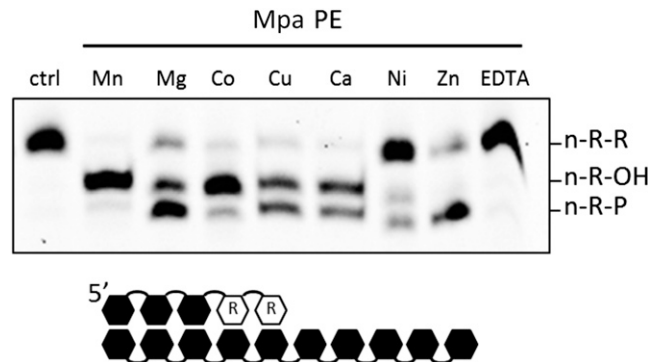

**Fig. 54.** Mpa PE ion preference. PE reaction mixtures contained 50 mM Tris (pH 7.5), 5 mM MnCl<sub>2</sub>, MgCl<sub>2</sub>, CoCl<sub>2</sub>, CuCl<sub>2</sub>, CaCl<sub>2</sub>, NiCl<sub>2</sub>, or Zn(O<sub>2</sub>CCH<sub>3</sub>)<sub>2</sub> where indicated, 30 nM 5'-fluorescein-labeled 16mer DNA/RNA (D14R2), and 300 nM Mpa PE protein. Reactions were incubated at 37 °C for 1.5 h and electrophoresed on a 15% denaturing polyacrylamide gel. n-R-R, unmodified substrate; n-R-P, removal of the terminal ribonucleotide monophosphate to yield a terminal phosphate group; n-R-OH, product after phosphate removal leaving a terminal OH group.

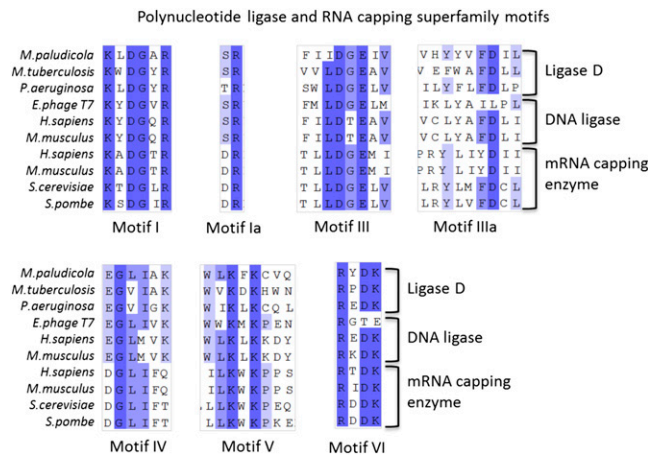

**Fig. 55.** Polynucleotide ligase and mRNA-capping superfamily motifs. Six key conserved motifs (I, Ia, III, IIIa, IV, and V) confer membership in the polynucleotide ligase and mRNA-capping superfamily. Motif VI also is included with highly conserved residues. Here Mpa Lig is aligned with Mtu and Pae LigD; Enterobacteria phage T7, *H. sapiens*, and *M. musculus* DNA ligase; and *H. sapiens*, *M. musculus*, *D. melanogaster*, *S. cerevisiae*, and *S. pombe* mRNA-capping enzymes.



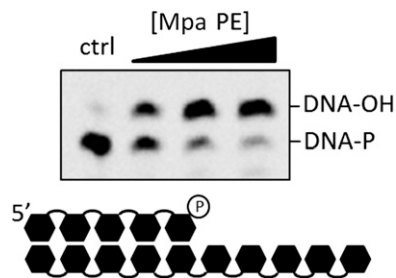

**Fig. 58.** Mpa PE phosphomonoesterase activity does not require 2'-OH. Phosphatase reaction mixtures contained 50 mM Tris (pH 7.5), 5 mM  $MnCl_2$ , 30 nM 5'-fluorescein-labeled 16mer DNA with 3' phosphate, and 250, 500, and 1,000 nM Mpa PE protein. Reactions were incubated at 37 °C for 1.5 h and electrophoresed on a 15% denaturing polyacrylamide gel.

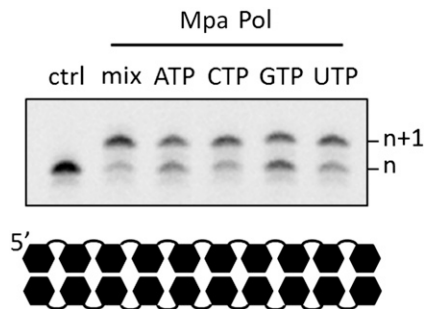

**Fig. 59.** Mpa Pol incorporation of nontemplated NTP. Pol nontemplated extension reaction mixtures contained 50 mM Tris (pH7.5), 5 mM  $MnCl_2$ , 62.5  $\mu M$  ATP, CTP, GTP, UTP, or 250  $\mu M$  mixed nucleoside triphosphates (NTPs) and, where indicated, 30 nM 5'-fluorescein-labeled 36mer DNA and 300 nM Mpa Pol protein. Reactions were incubated at 37 °C for 1 h and electrophoresed on a 15% denaturing polyacrylamide gel.

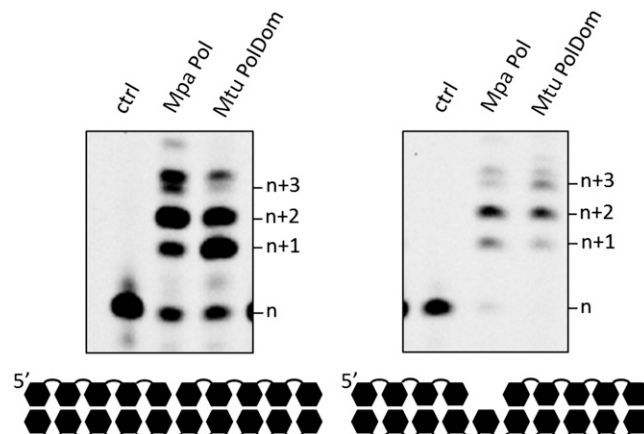

**Fig. 510.** Mtu Pol domain (PolDom) strand displacement. Polymerase strand displacement reaction mixtures contained 50 mM Tris (pH 7.5), 5 mM  $MnCl_2$ , 250  $\mu M$  NTPs, 30 nM 5'-fluorescein-labeled 16mer DNA, and 300 nM Mpa Pol or Mtu PolDom protein where indicated. Reactions were incubated at 37 °C for 1 h and electrophoresed on a 15% denaturing polyacrylamide gel.

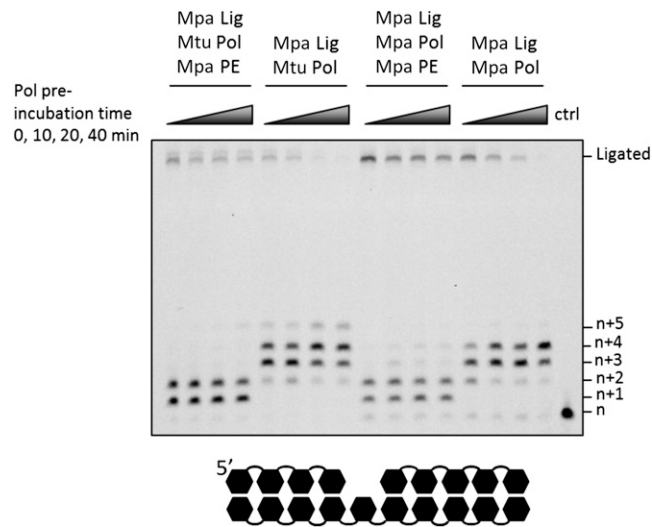

**Fig. S11.** Mpa PE can rescue NHEJ intermediates formed by Mtu PolDom and Mpa Pol. Gap-filling, PE, and ligation reaction mixtures contained 50 mM Tris (pH 7.5), 5 mM MnCl<sub>2</sub>, 250 μM NTPs, 30 nM 5'-fluorescein-labeled 16mer DNA, and 300 nM Mpa Pol or Mtu PolDom, 300 nM Mpa Lig, and PE protein where indicated. Reactions were incubated at 37 °C for 1 h and electrophoresed on a 15% denaturing polyacrylamide gel.

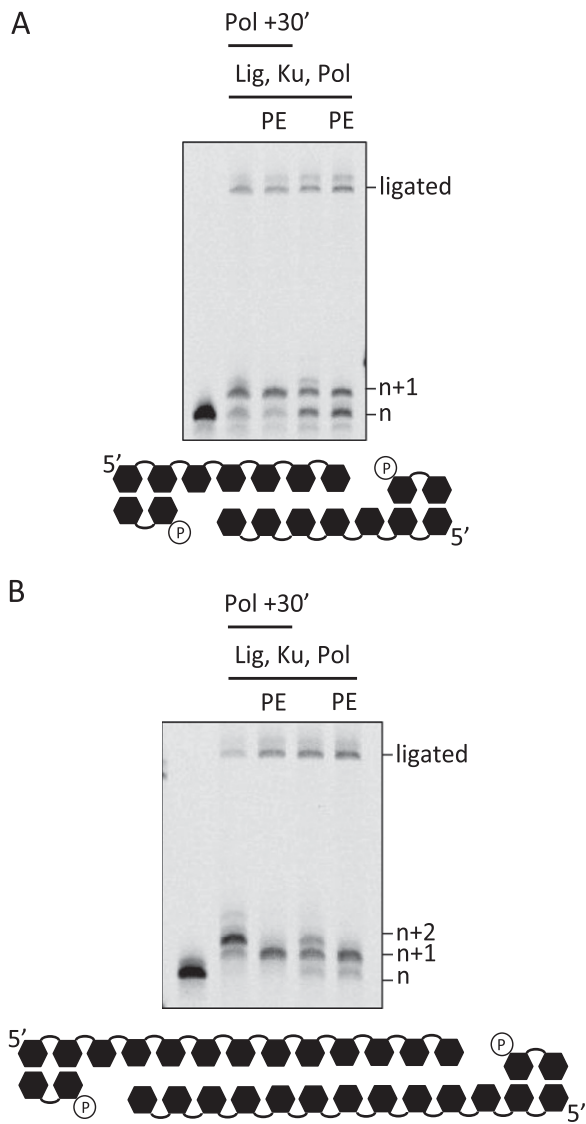

**Fig. S12.** Mpa PE resection of strand-displacement intermediates during 3' overhang NHEJ repair. Gap-filling, PE, and ligation reaction mixtures contained 50 mM Tris (pH 7.5), 5 mM MnCl<sub>2</sub>, 250 μM NTPs, 30 nM 5'-fluorescein-labeled 42mer DNA (A) and 48mer DNA (B), and 300 nM Mpa Pol, Lig, and PE and 400 nM Ku protein where indicated above the lanes. Mpa Pol was preincubated with the substrate for 30 min where indicated above the lanes before the addition of Mpa Lig, PE and Ku. Electrophoresed on a 15% denaturing polyacrylamide gel.
